# Supplementary material for: Multi-target antibacterial mechanism of ruthenium polypyridine complexes with anthraquinone groups againstStaphylococcus aureus
Source: Royal Society of Chemistry journal article supplement (doi:10.1039/d2md00430e), 2023-01-01
Supplement: d2md00430e1.pdf [file d2md00430e1.pdf]

# Multi-Target Antibacterial Mechanism of Ruthenium Polypyridine Complexes with anthraquinone groups against *Staphylococcus aureus*

## Contents

|                                                                                                                    |            |
|--------------------------------------------------------------------------------------------------------------------|------------|
| Fig. S1. The synthetic route of three Ru(II) complexes.....                                                        | 1          |
| Fig. S2-S5. The <sup>1</sup> H NMR of PPAD ligand and <b>Ru-1 - Ru-3</b> .....                                     | 1-3        |
| Fig. S6-S9. The <sup>13</sup> C NMR of PPAD ligand and <b>Ru-1 - Ru-3</b> .....                                    | 3-5        |
| Fig. S10-S13. The HMRS of PPAD ligand and <b>Ru-1 - Ru-3</b> .....                                                 | 6-9        |
| Fig. S14. The HPLC trace of <b>Ru-1 - Ru-3</b> .....                                                               | 10         |
| Fig. S15. The stability of three complexes ( <b>Ru-1 - Ru-3</b> ) in acetonitrile or water at 0 h,<br>and<br>..... | 48 h<br>11 |
| Table S1. MIC of <b>Ru-1</b> to <i>S. aureus</i> with different antibiotic resistance.....                         |            |

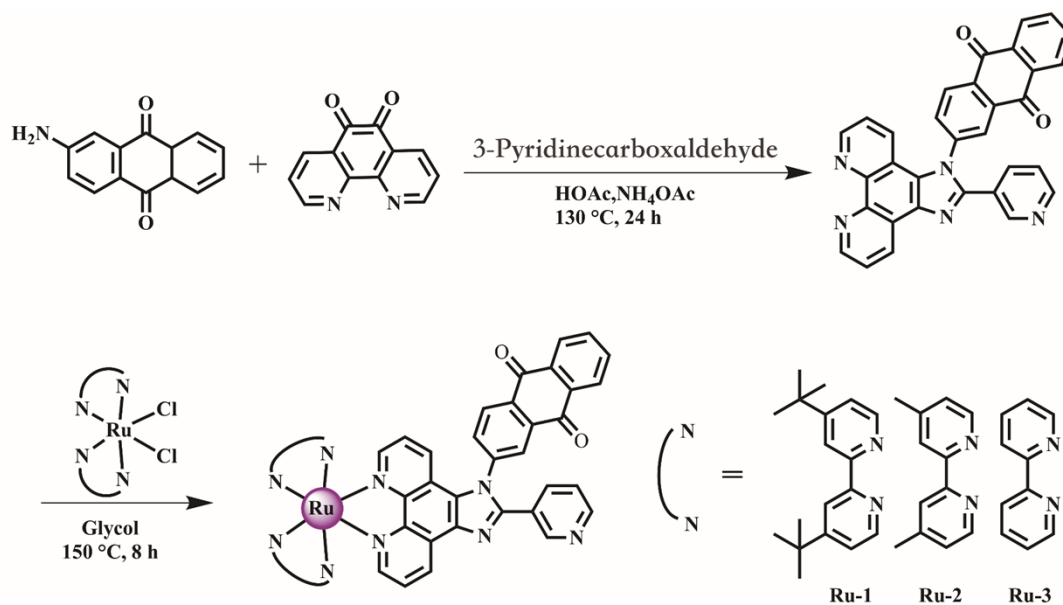

Fig. S1. The synthetic route of three Ru(II) complexes.

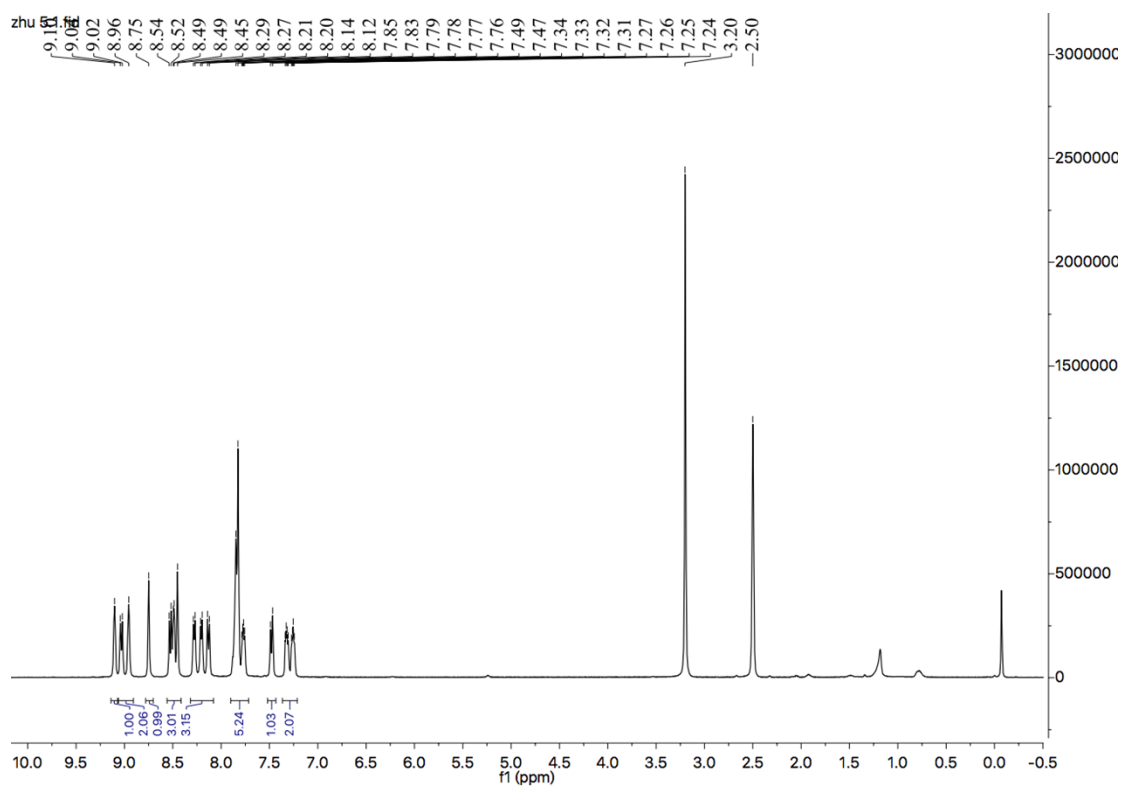

Fig. S2. <sup>1</sup>H NMR spectrum of PPAD.

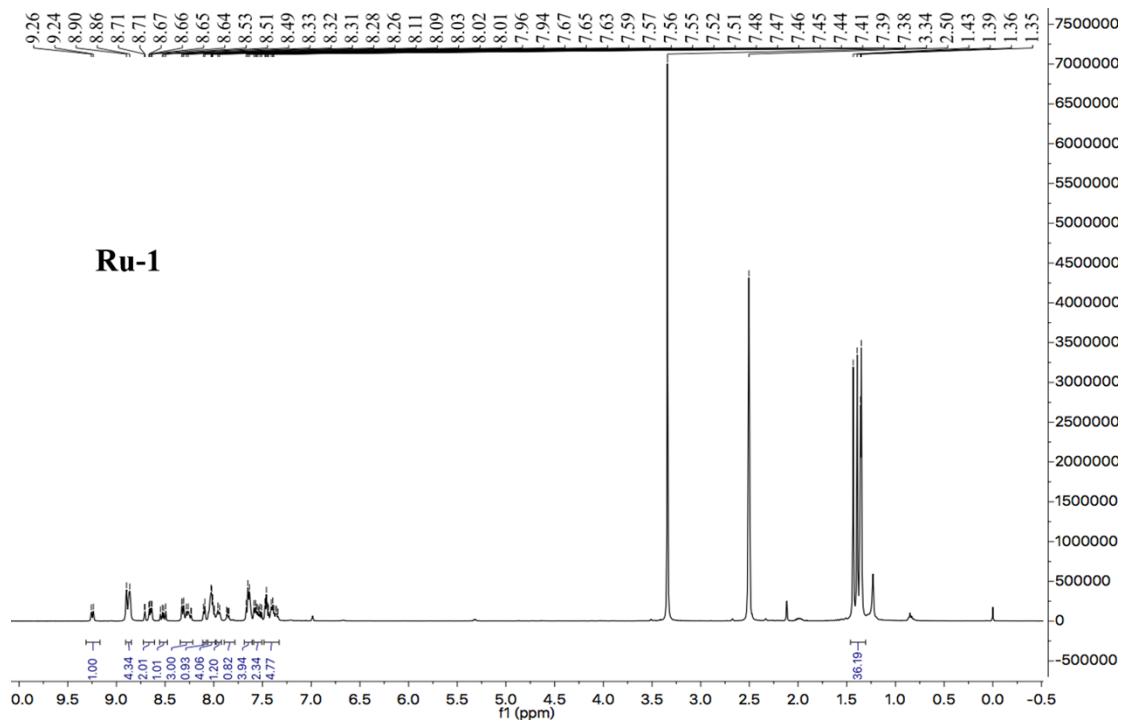

Fig. S3  $^1\text{H}$  NMR spectrum of Ru-1.

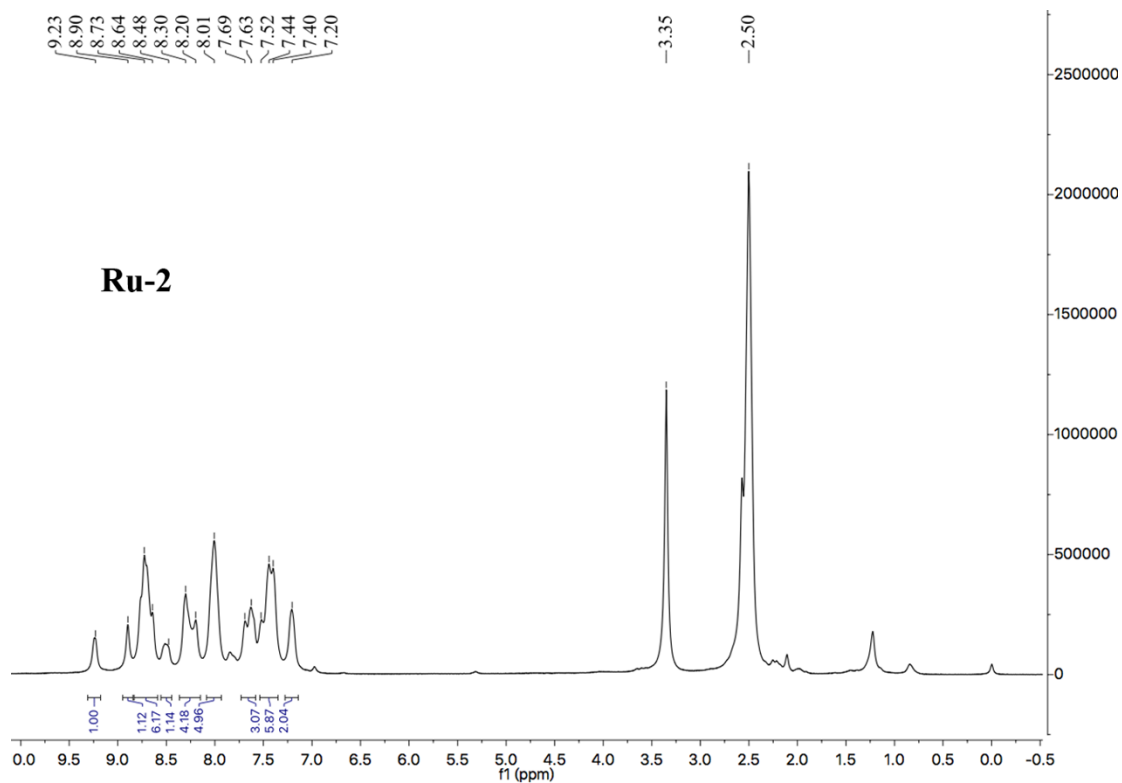

Fig. S4  $^1\text{H}$  NMR spectrum of Ru-2.

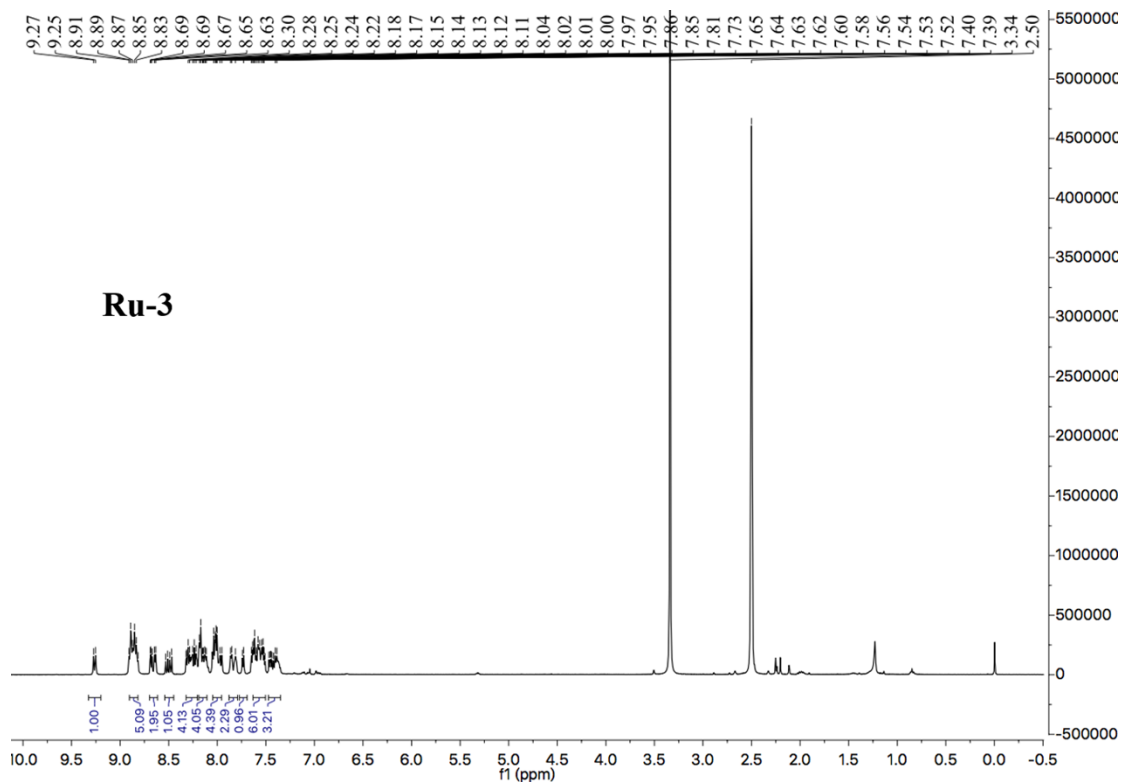

Fig. S5  $^1\text{H}$  NMR spectrum of Ru-3.

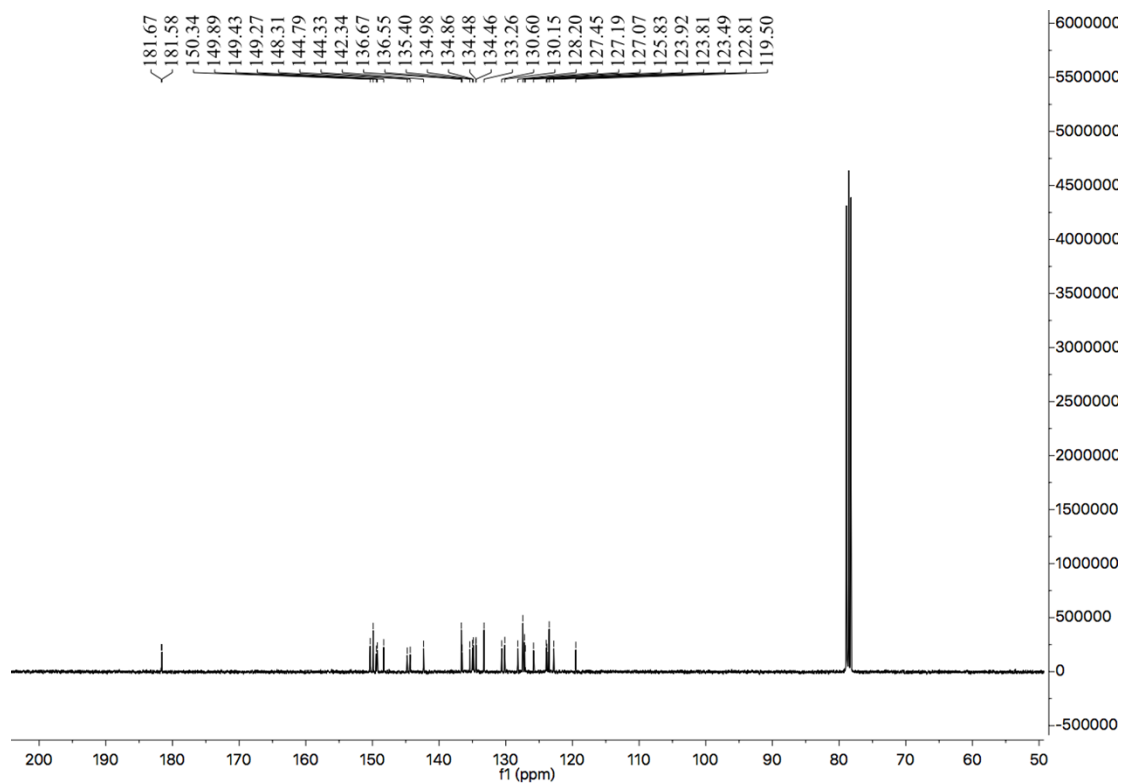

Fig. S6.  $^{13}\text{C}$  NMR spectrum of PPAD.

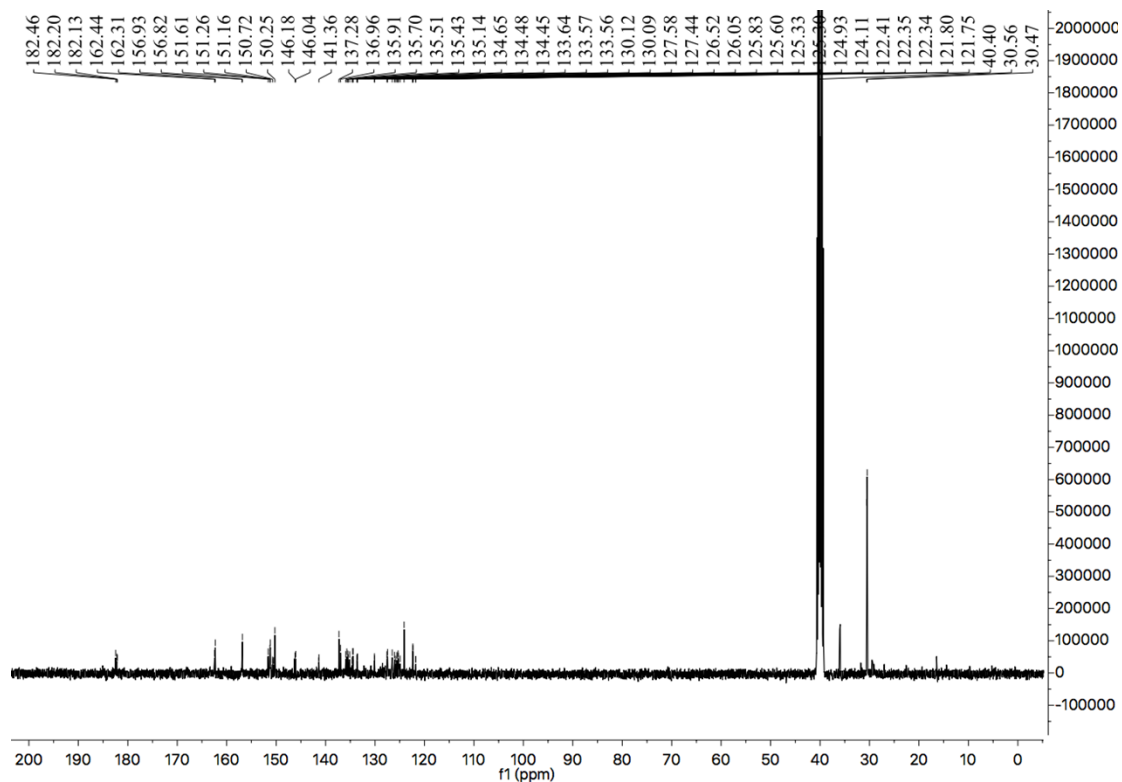

Fig. S7  $^{13}\text{C}$  NMR spectrum of Ru-1.

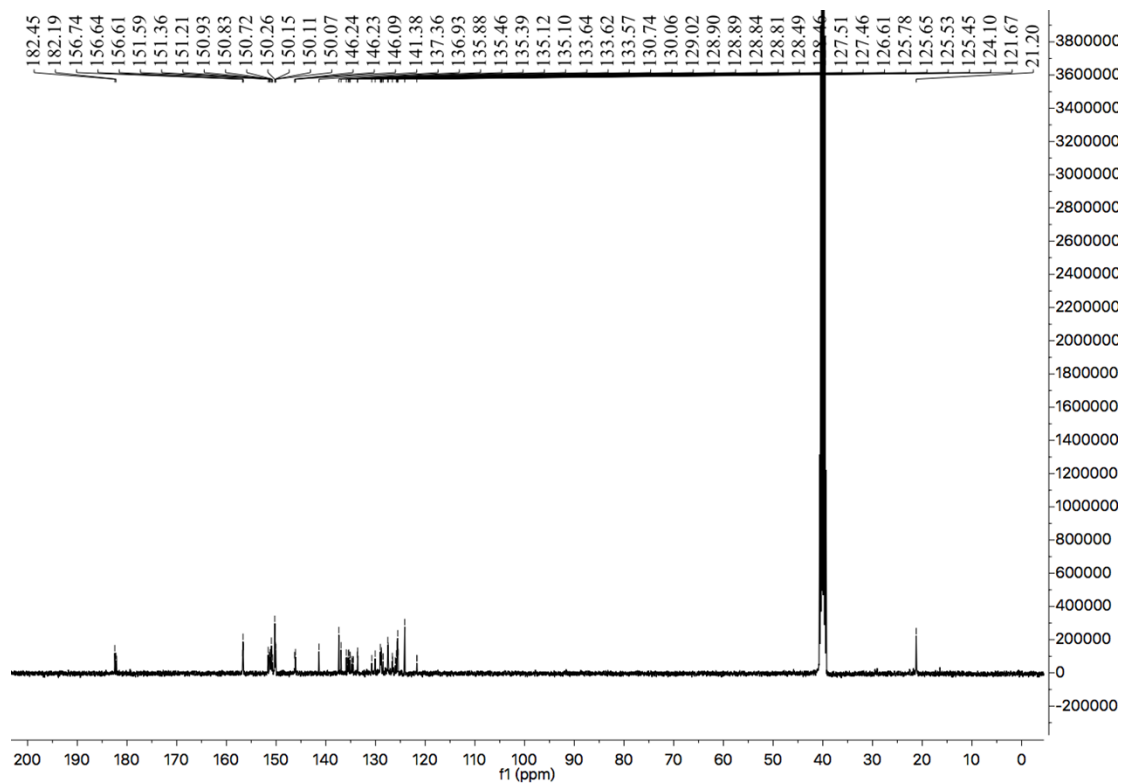

Fig. S8  $^{13}\text{C}$  NMR spectrum of Ru-2.

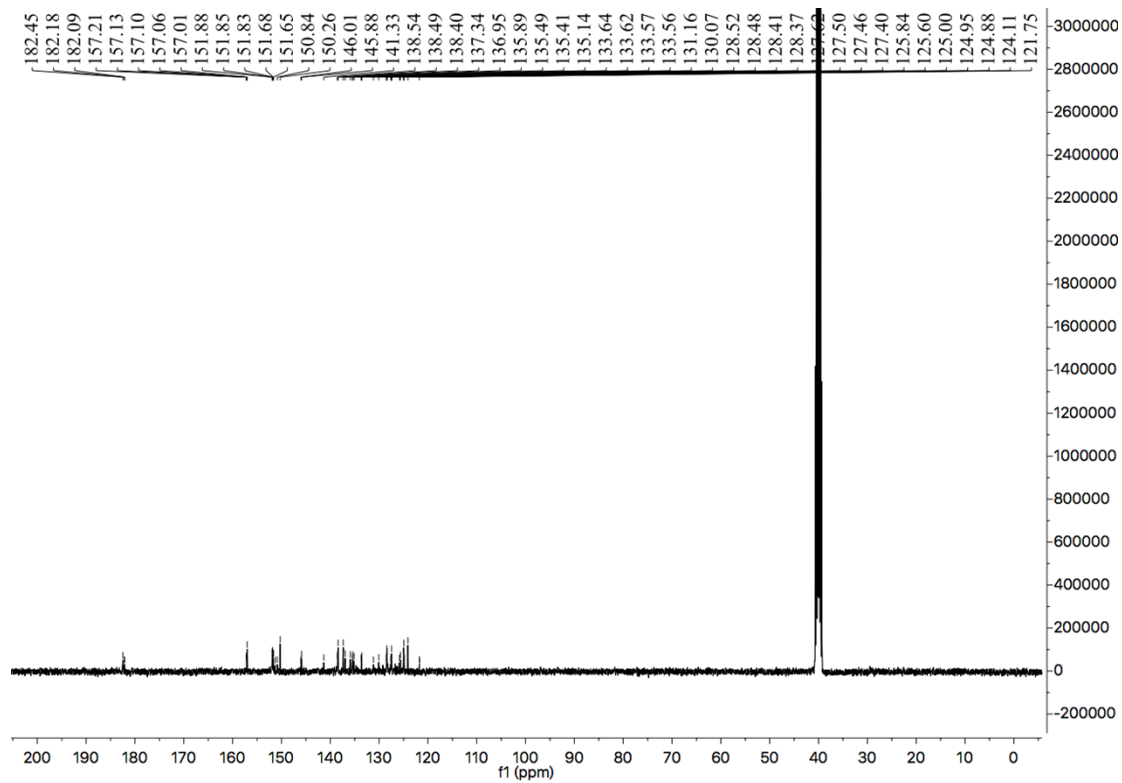

Fig. S9  $^{13}\text{C}$  NMR spectrum of **Ru-3**.

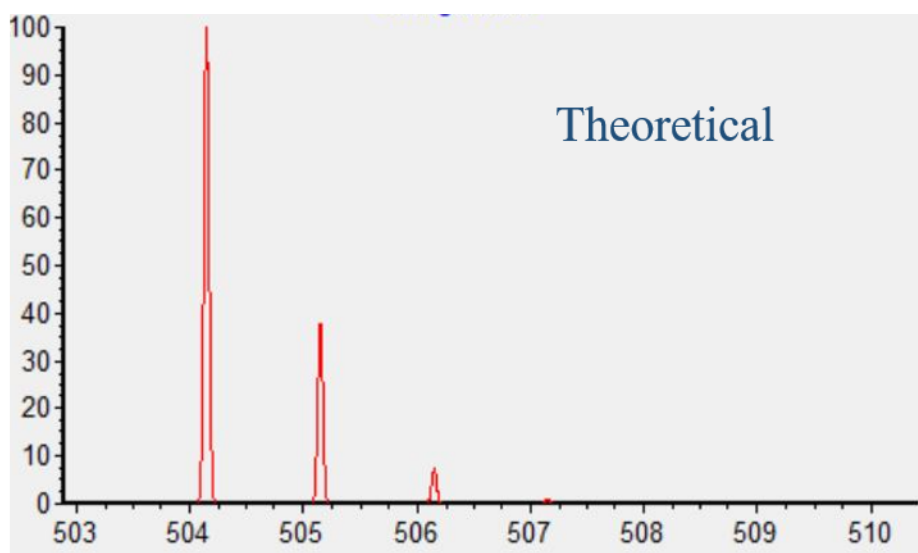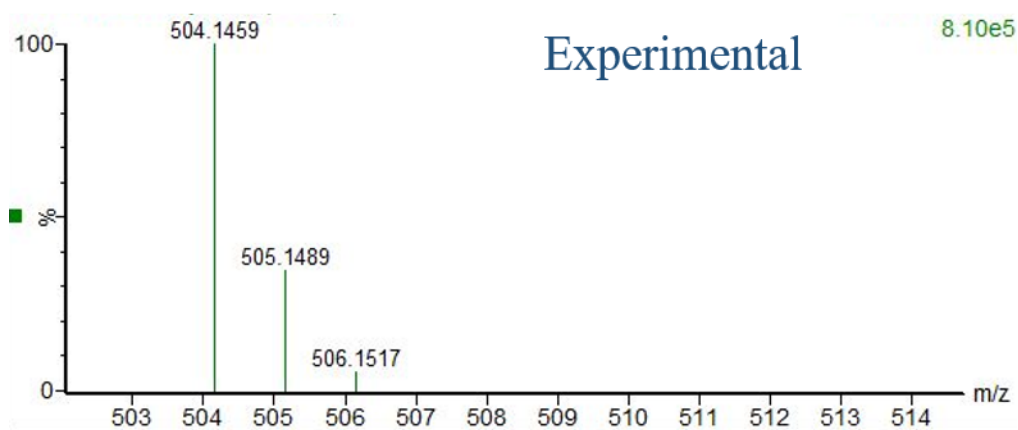

Fig. S10 HRMS spectrum of PPAD.

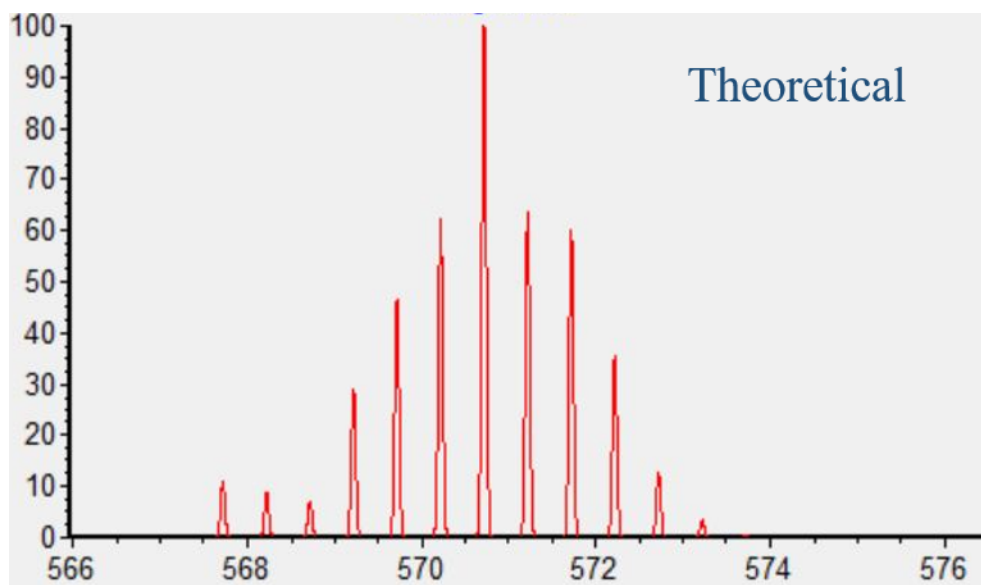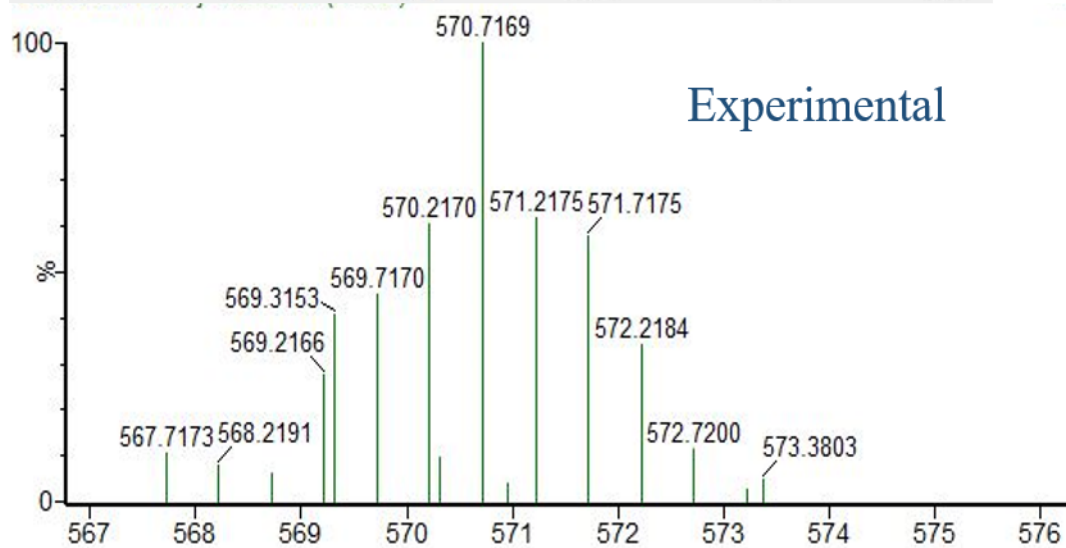

Fig. S11 HRMS spectrum of **Ru-1**.



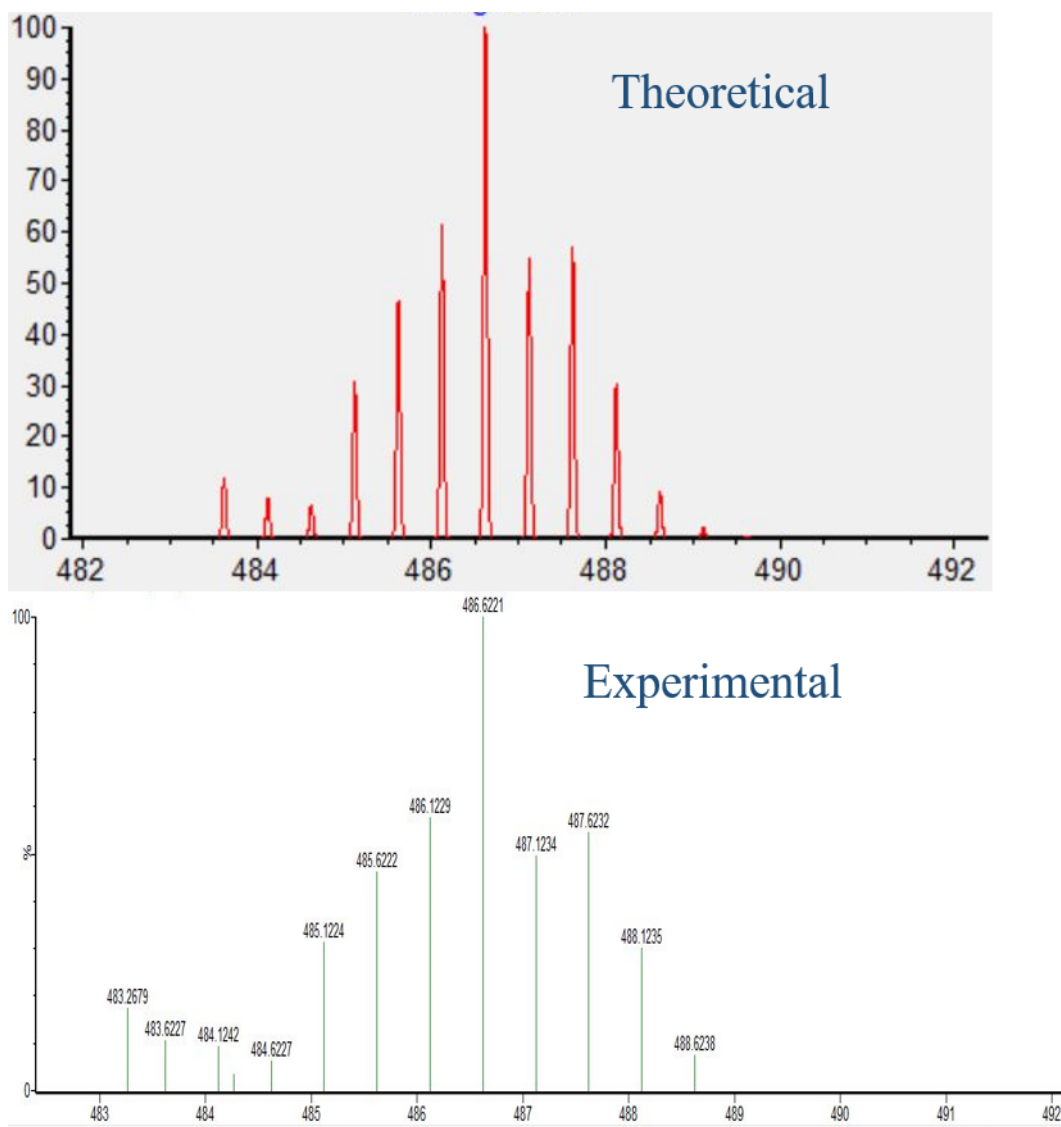

Fig. S12 HRMS spectrum of **Ru-2**.

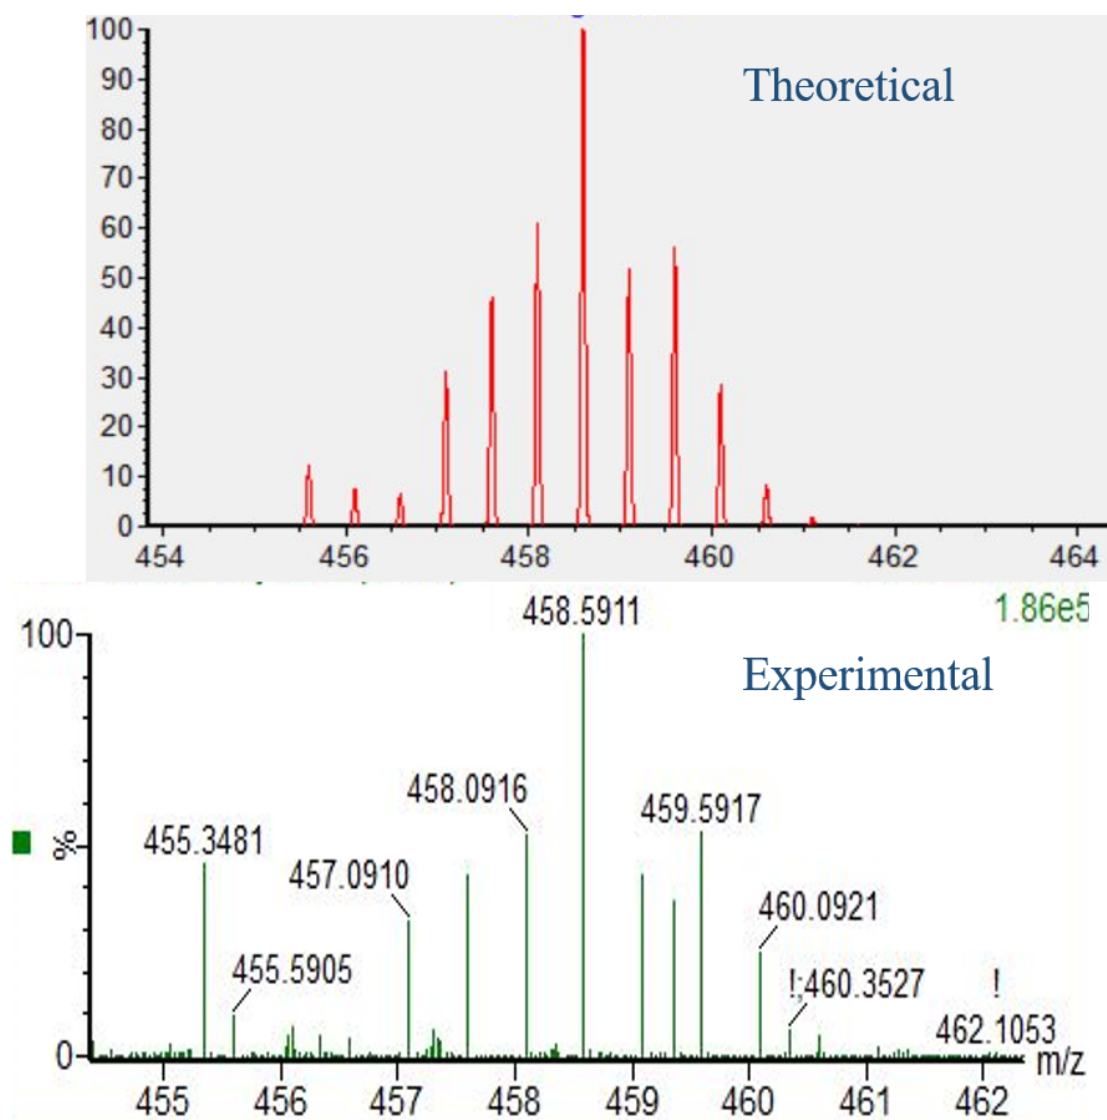

Fig. S13 HRMS spectrum of **Ru-3**.

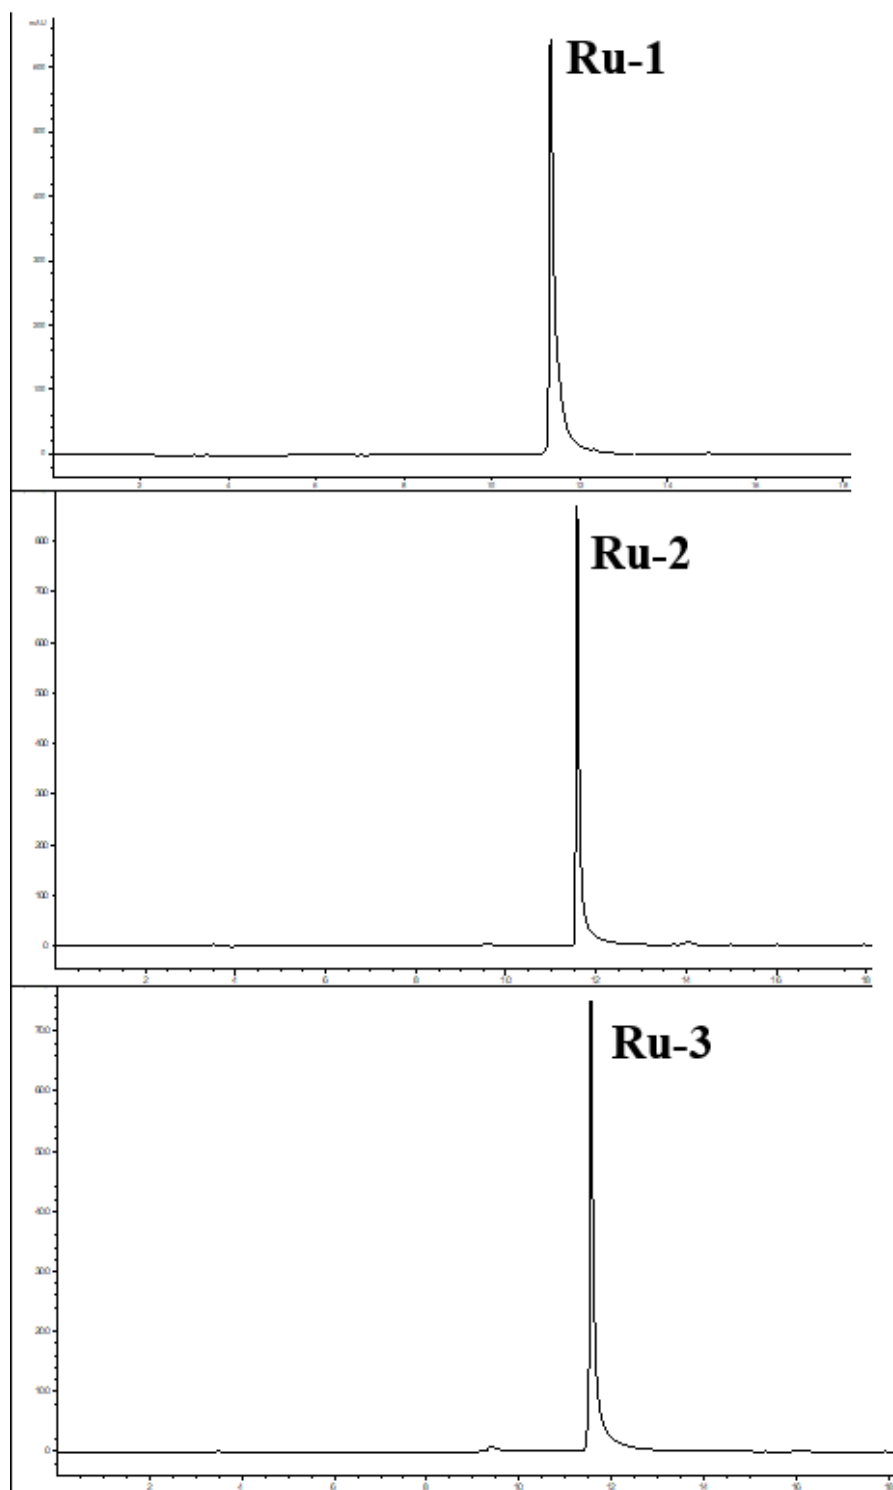

Fig. S14 HPLC spectrum of **Ru-1**, **Ru-2** and **Ru-3**.

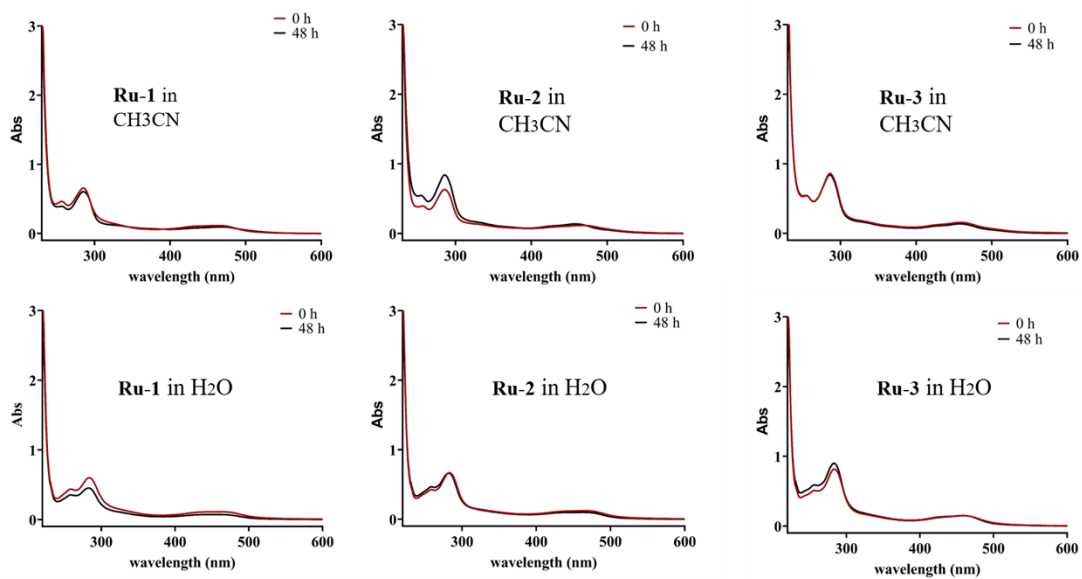

Fig. S15 stability of **Ru-1**, **Ru-2** and **Ru-3**.

Table S1. MIC ( $\mu\text{g/mL}$ ) of **Ru-1** to *S. aureus* with different antibiotic resistance.

|             | <i>S. aureus</i> | PBRSA | ORSA | ARSA | TRSA | CRSA |
|-------------|------------------|-------|------|------|------|------|
| <b>Ru-1</b> | 1                | 1     | 1    | 1    | 1    | 1    |

PBRSA: polymyxin B resistant *S. aureus*. ORSA: ofloxacin resistant *S. aureus*. ARSA: ampicillin resistant *S. aureus*. TRSA: tetracycline resistant *S. aureus*. CRSA: clindamycin resistant *S. aureus*.
